# Supplementary material
Source: PubMed Central journal article supplement (PMC4814194)
Supplement: ASN.2015040421_ASN2015040421SupplementaryData.pdf [file ASN.2015040421_ASN2015040421SupplementaryData.pdf]

# Supplementary figure 1 (Figure S1): Body weight, hyperglycemia, and albuminuria in diabetic and control mice

A.

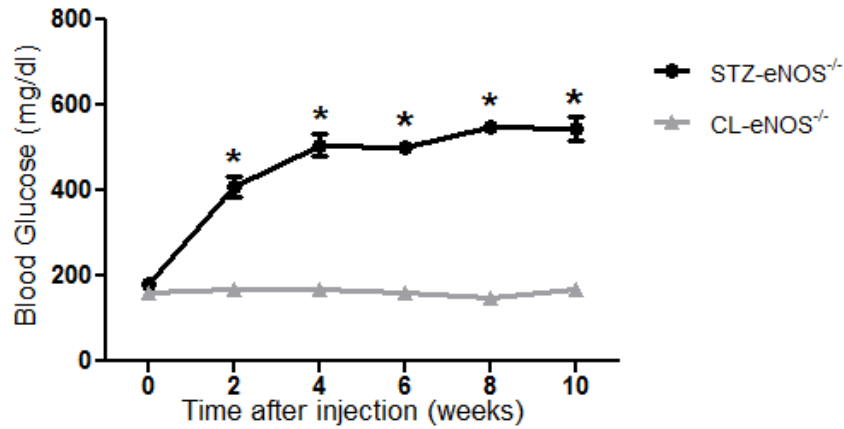

C.

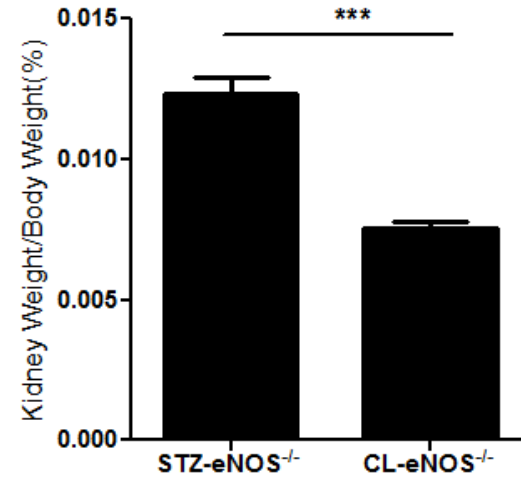

B.

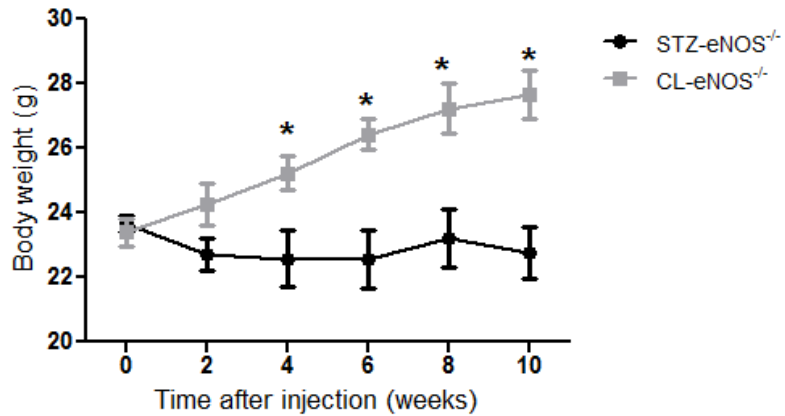

D.

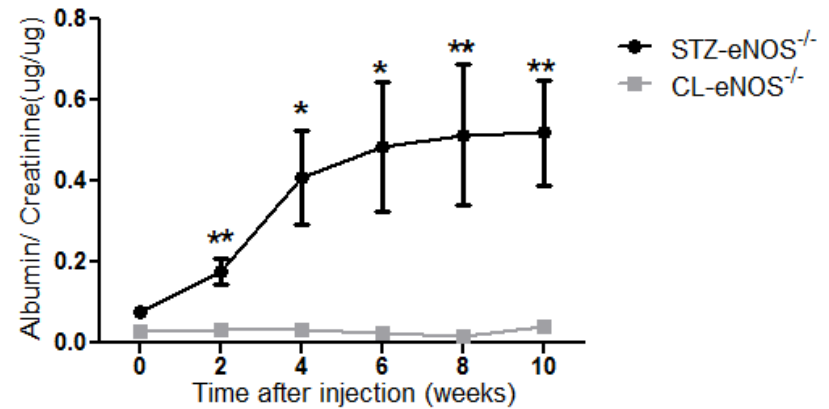

# Supplementary figure 2 (Figure S2): Histology and morphometric analysis

## A. Light microscopy

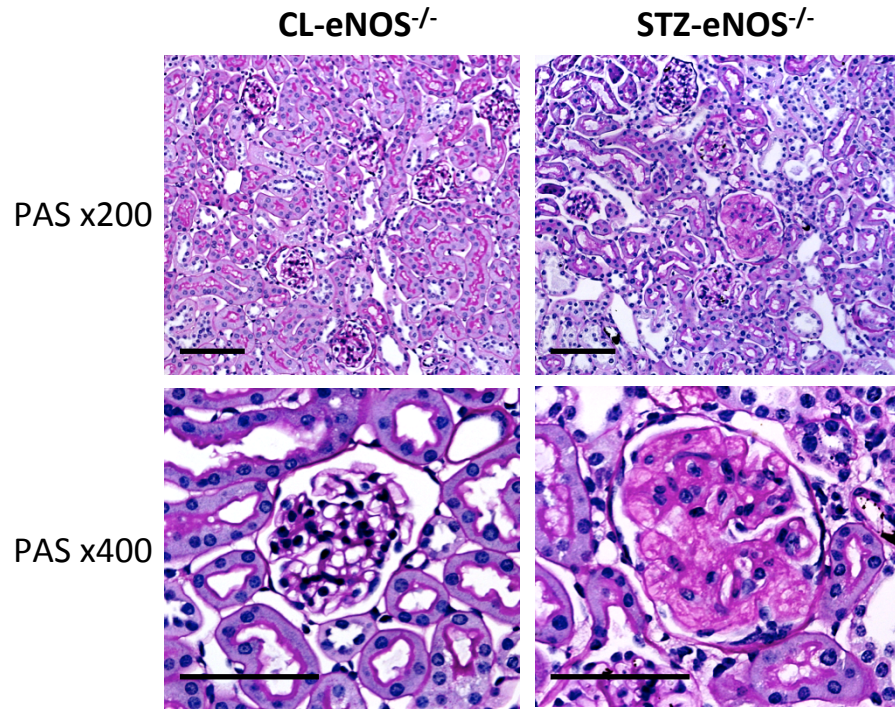

### Quantification of glomerular mesangial area

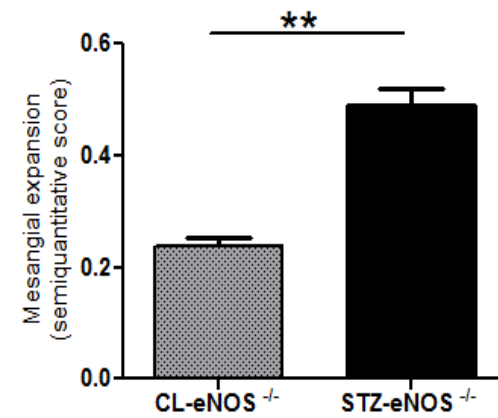

## B. EM

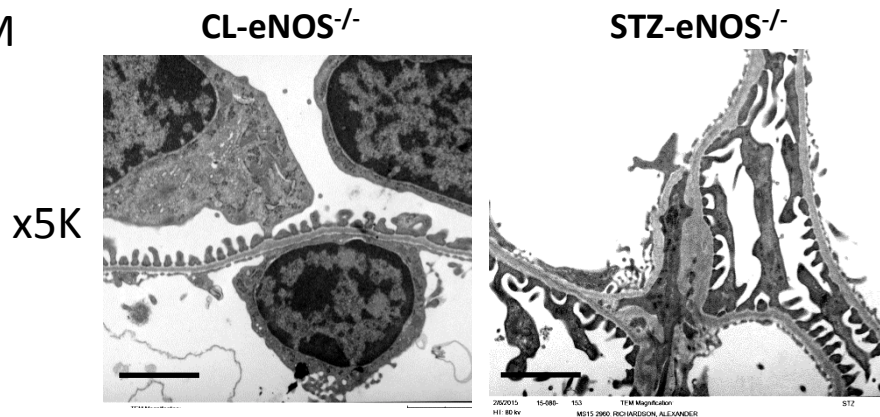

### Quantification of foot process width and GBM thickness

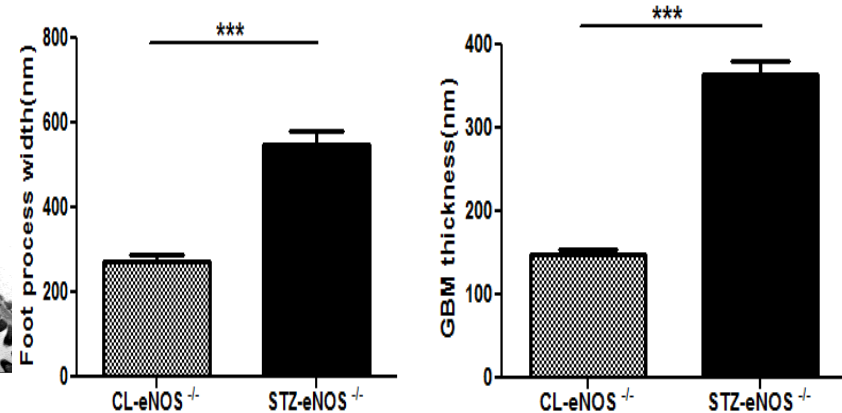

# Supplementary figure 3 (Figure S3): Podocyte sorting process and qPCR validation of markers in sorted podocytes

## A. Podocyte sorting process

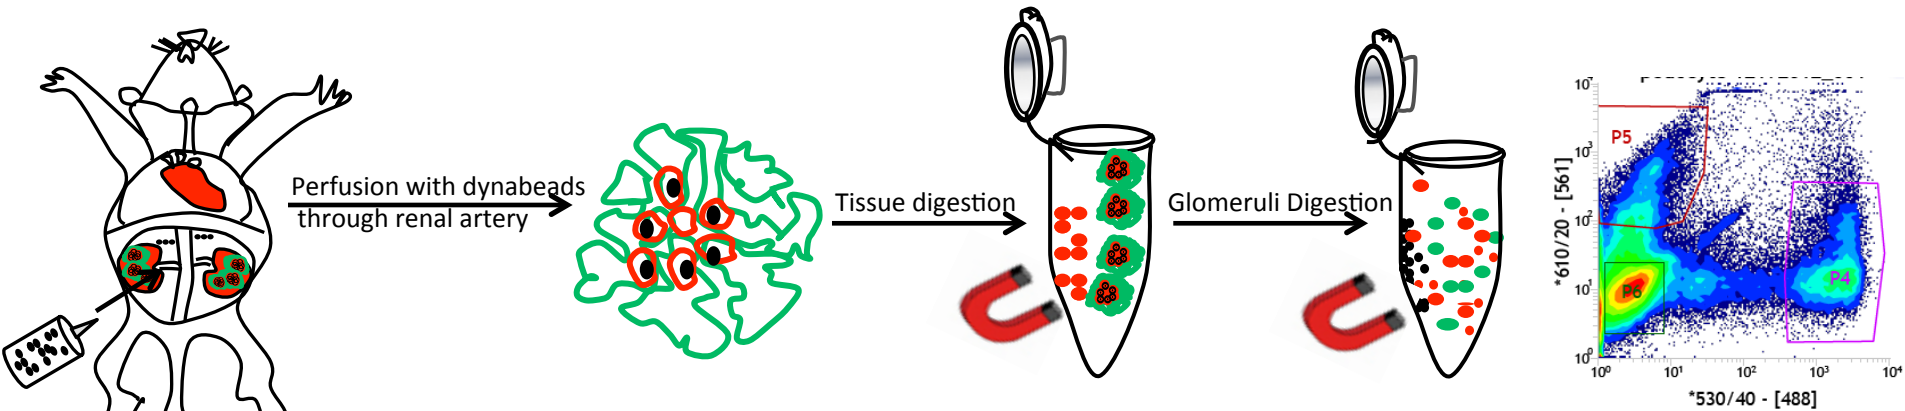

## B. Validation of podocyte marker expression in the sorted podocytes

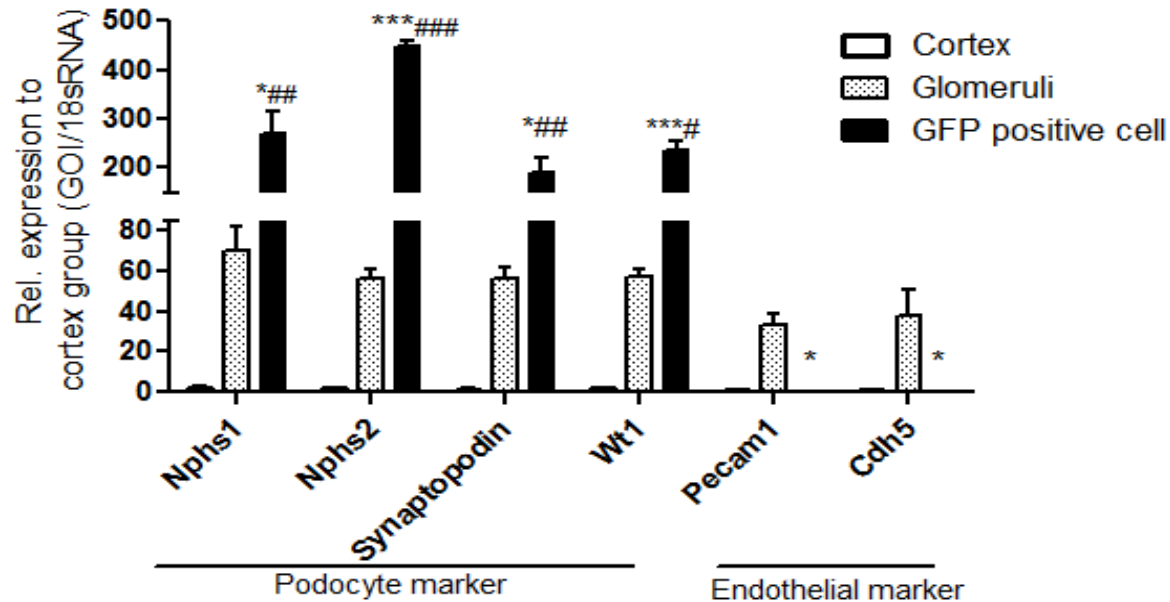

# Supplementary figure 4 (Figure S4): Podocyte number is reduced in diabetic glomeruli

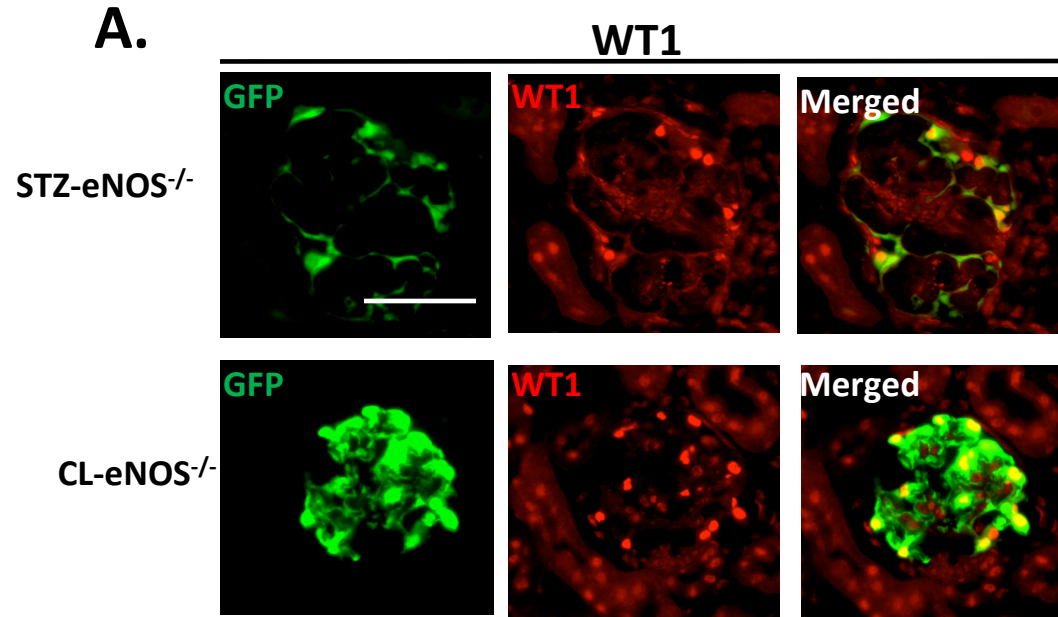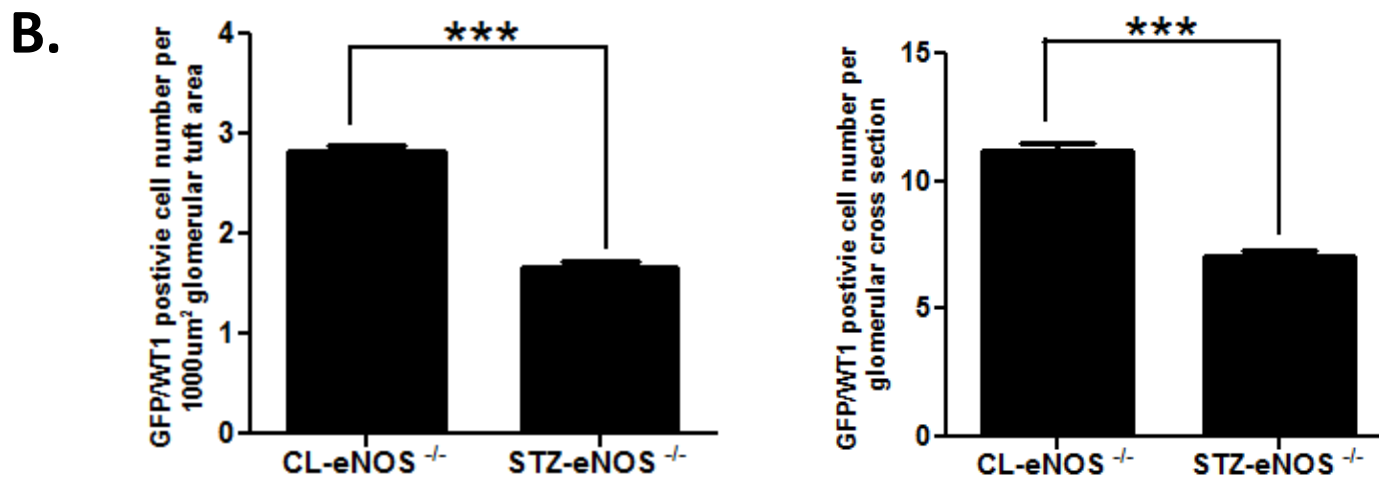

# Supplementary figure 5 (Figure S5): Immunostaining for EMT-related markers

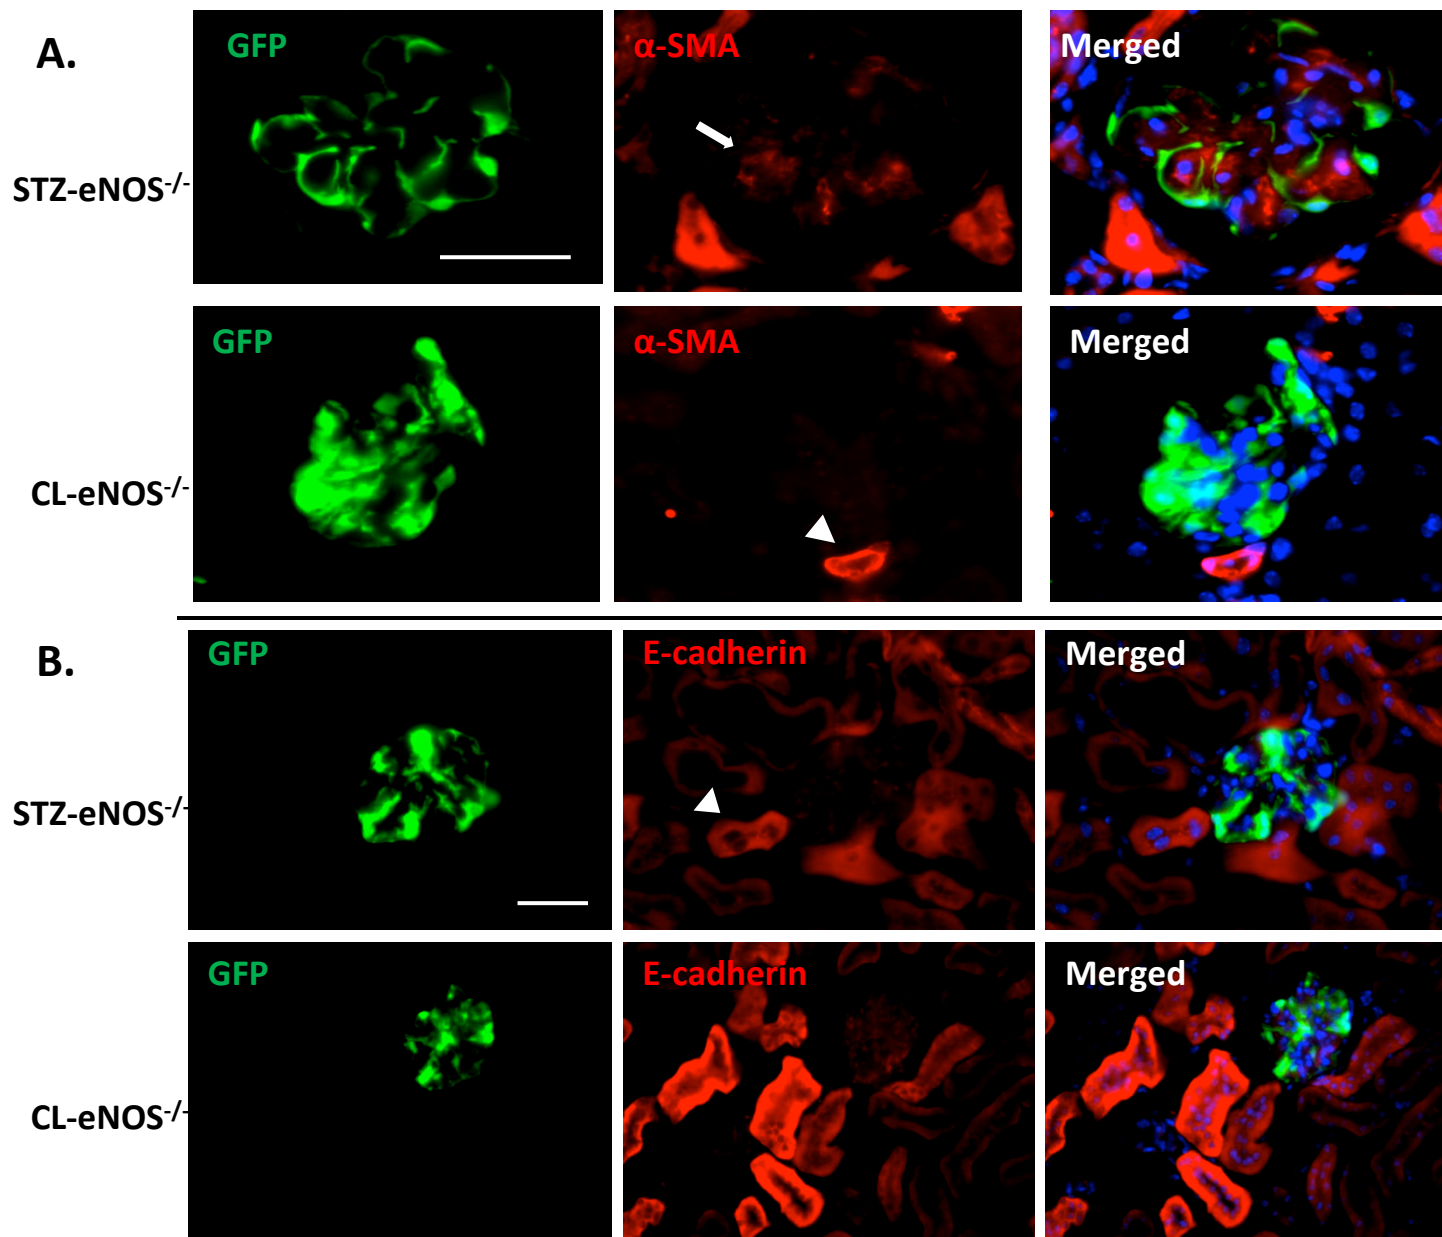

## Supplementary figure 6 (Figure S6): Immunostaining for cleaved caspase 3

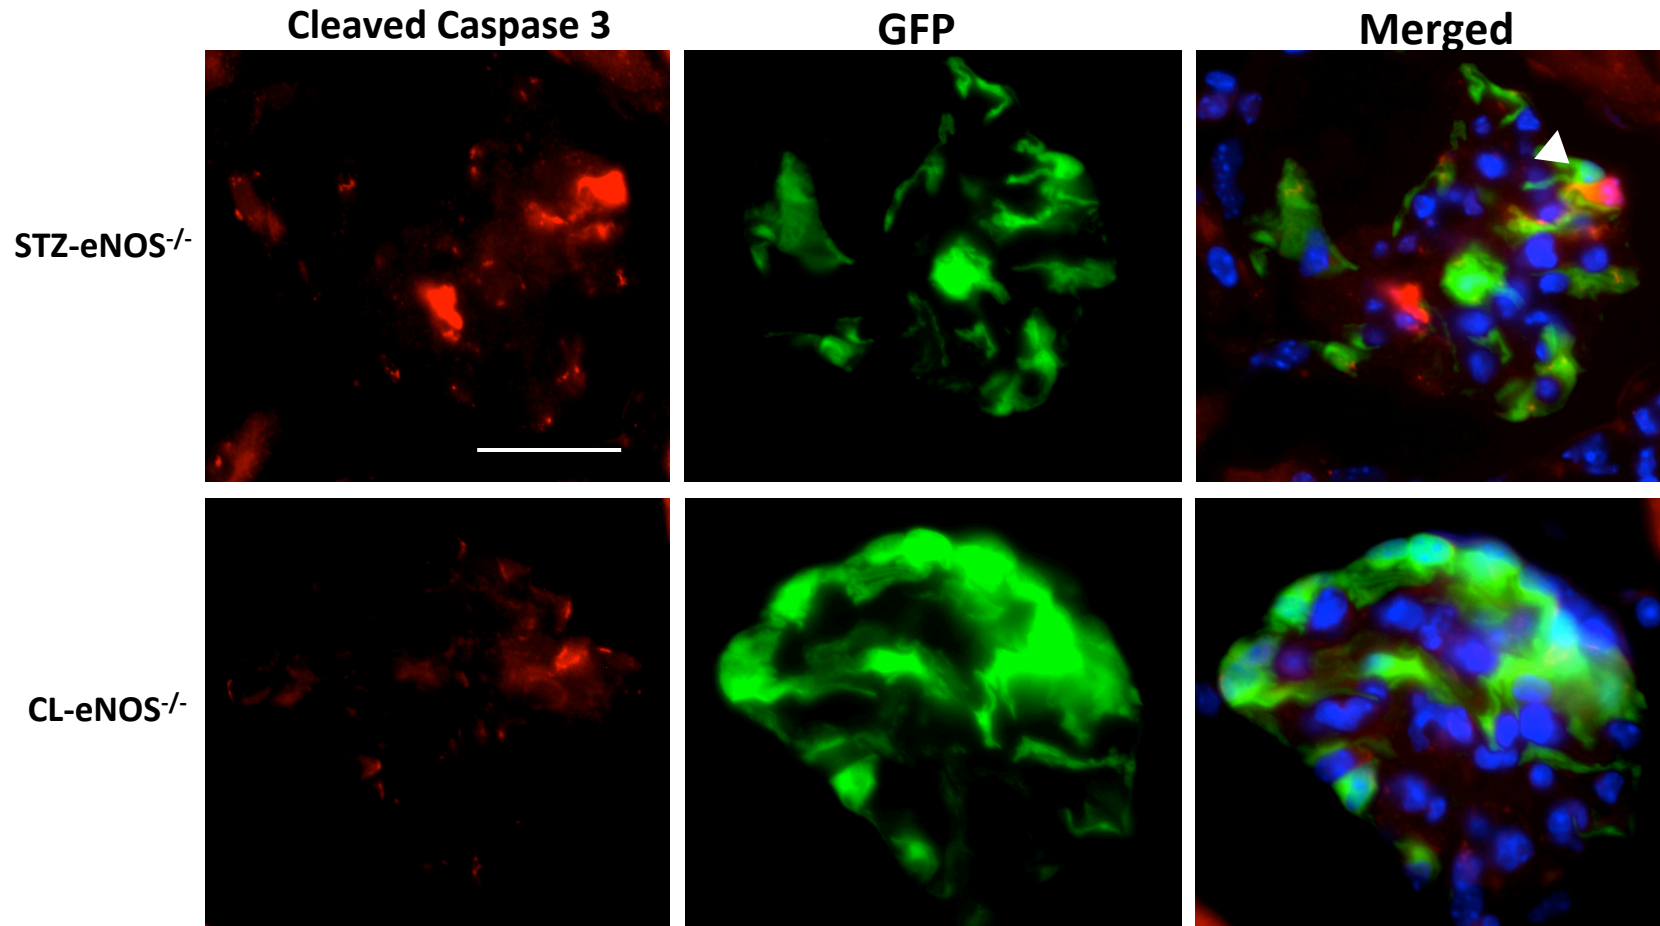

## Supplementary figure 7 (Figure S7):

### Go terms on up-regulated genes in STZ-glomeruli versus control glomeruli

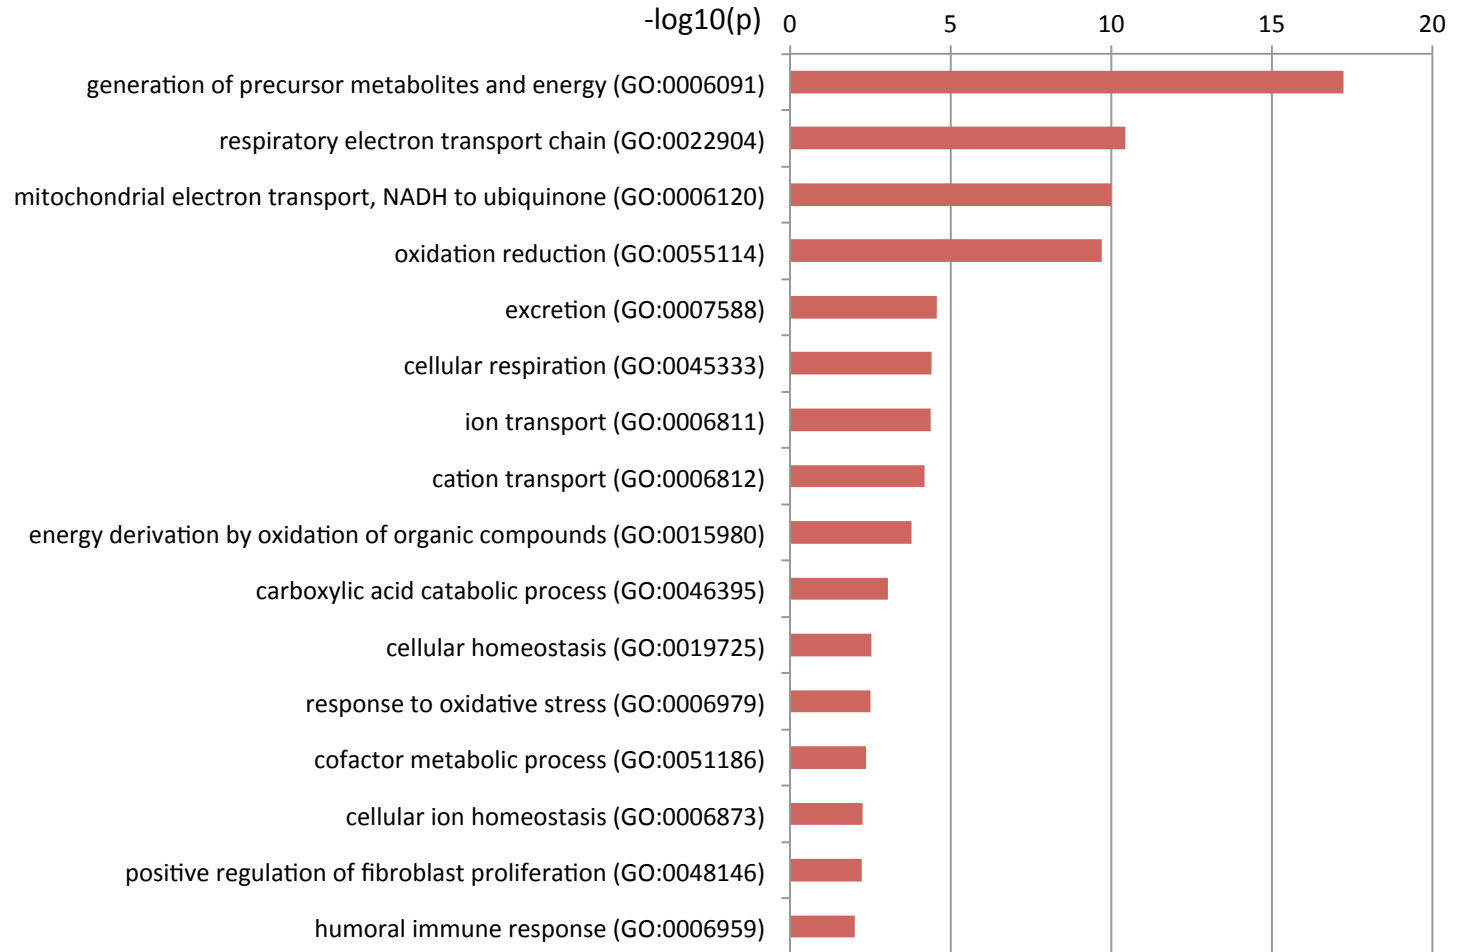

## Supplementary figure 8 (Figure S8):

### Go terms on down-regulated genes in STZ-glomeruli versus control glomeruli

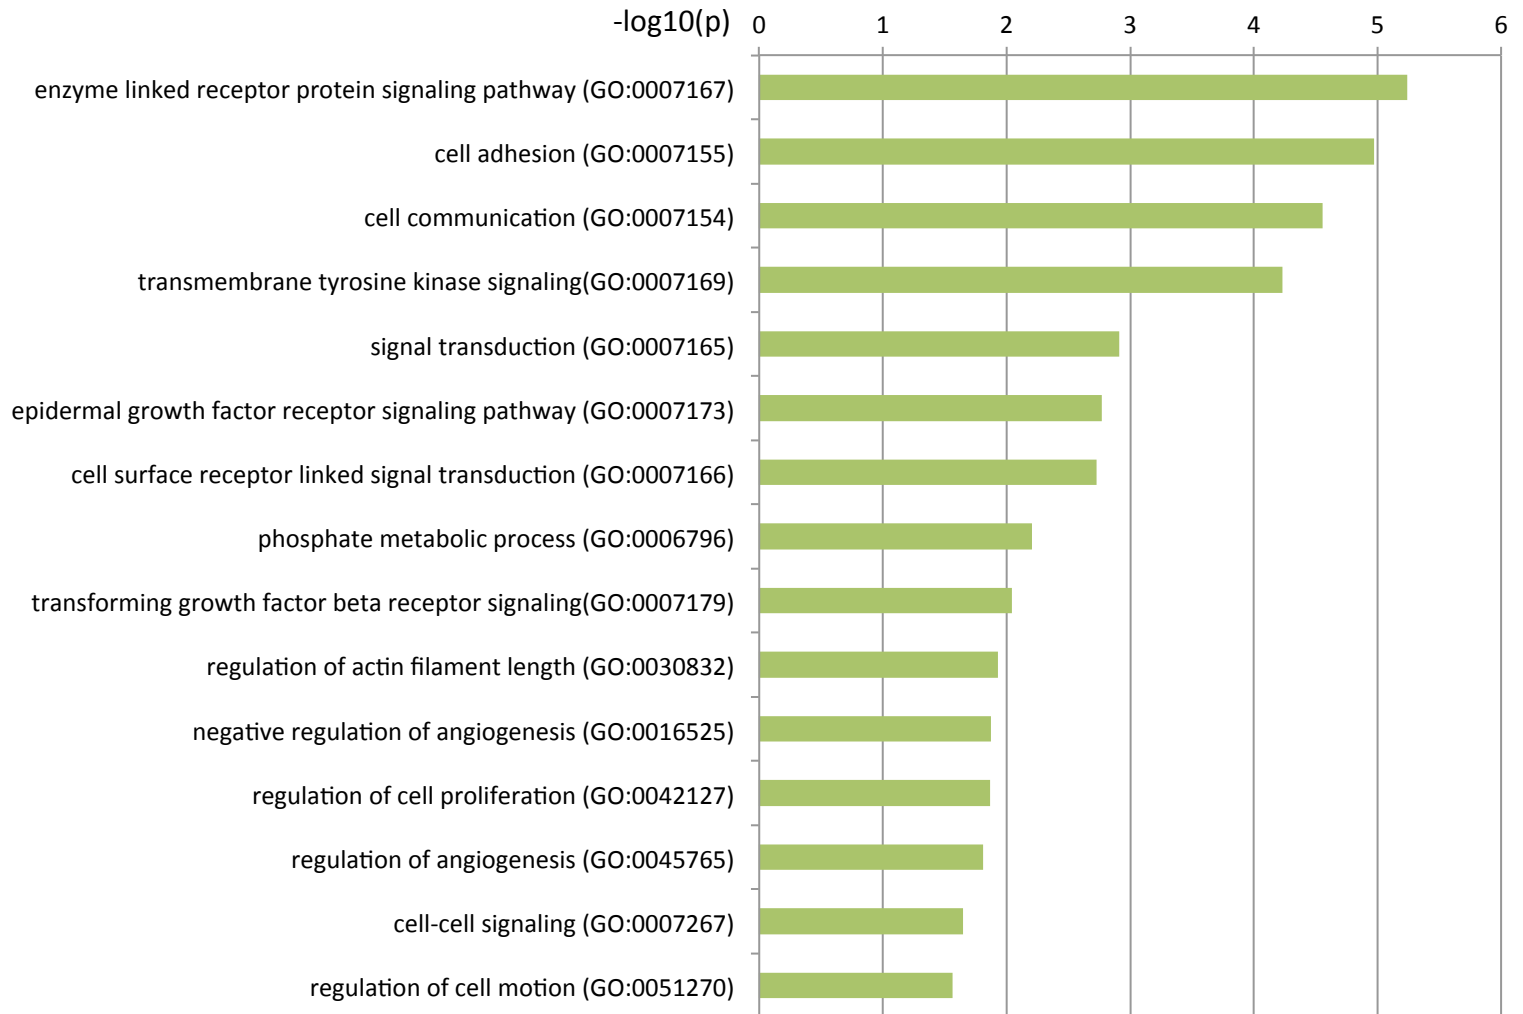



## Supplementary figure 9 (Figure S9)

### Go terms on up-regulated genes in STZ-Podocyte versus control podocytes

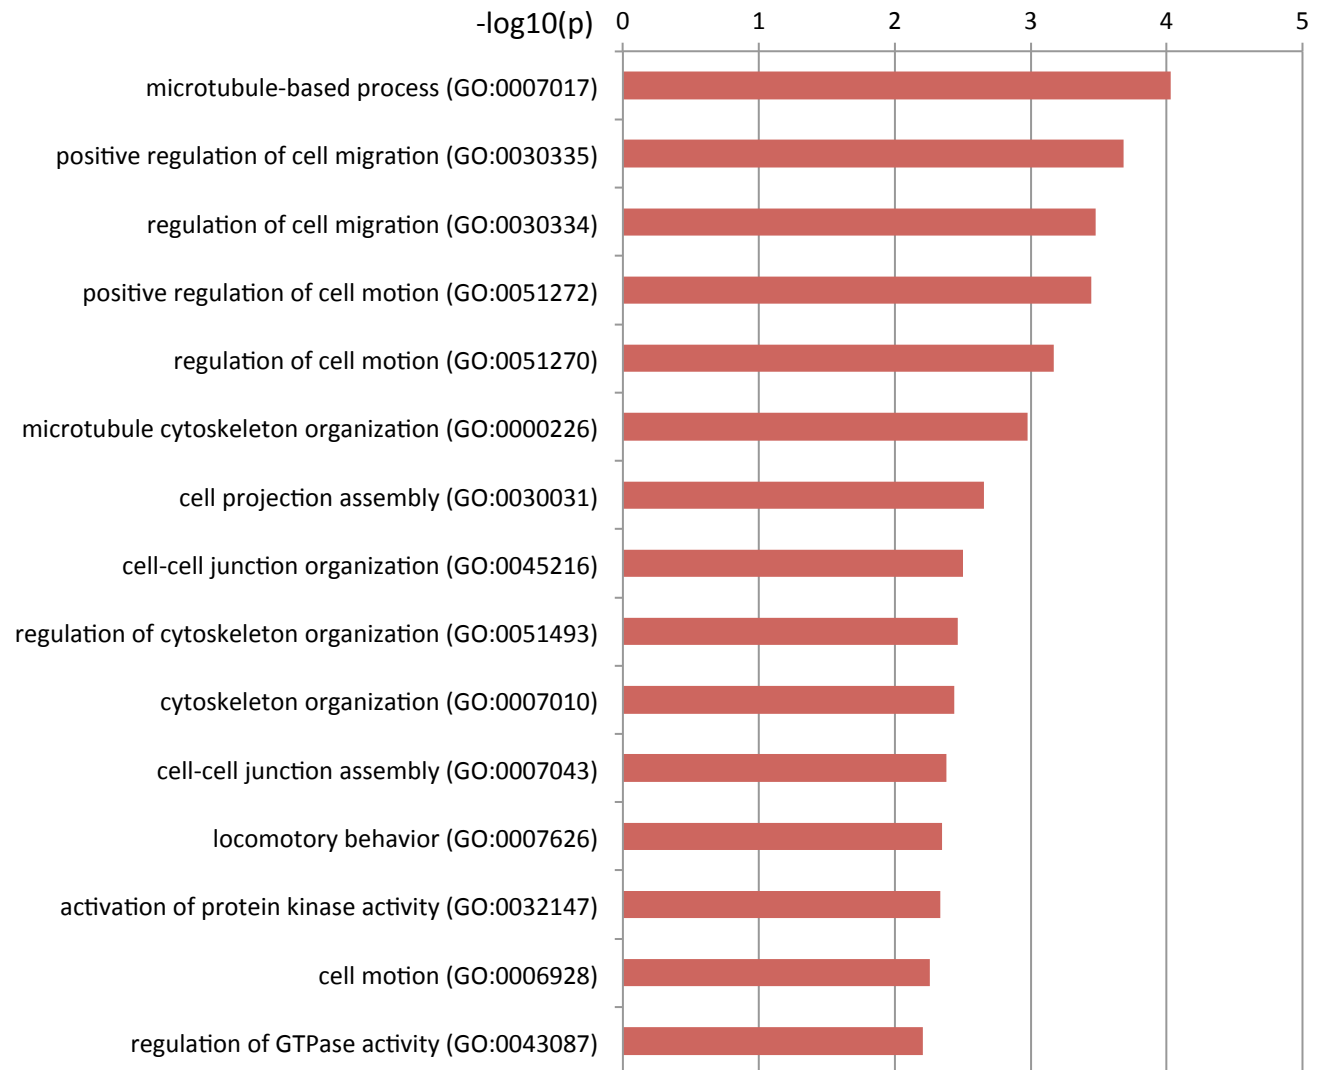

## Supplementary figure 10 (Figure S10): Go terms on down-regulated genes in STZ-Podocyte versus control podocytes

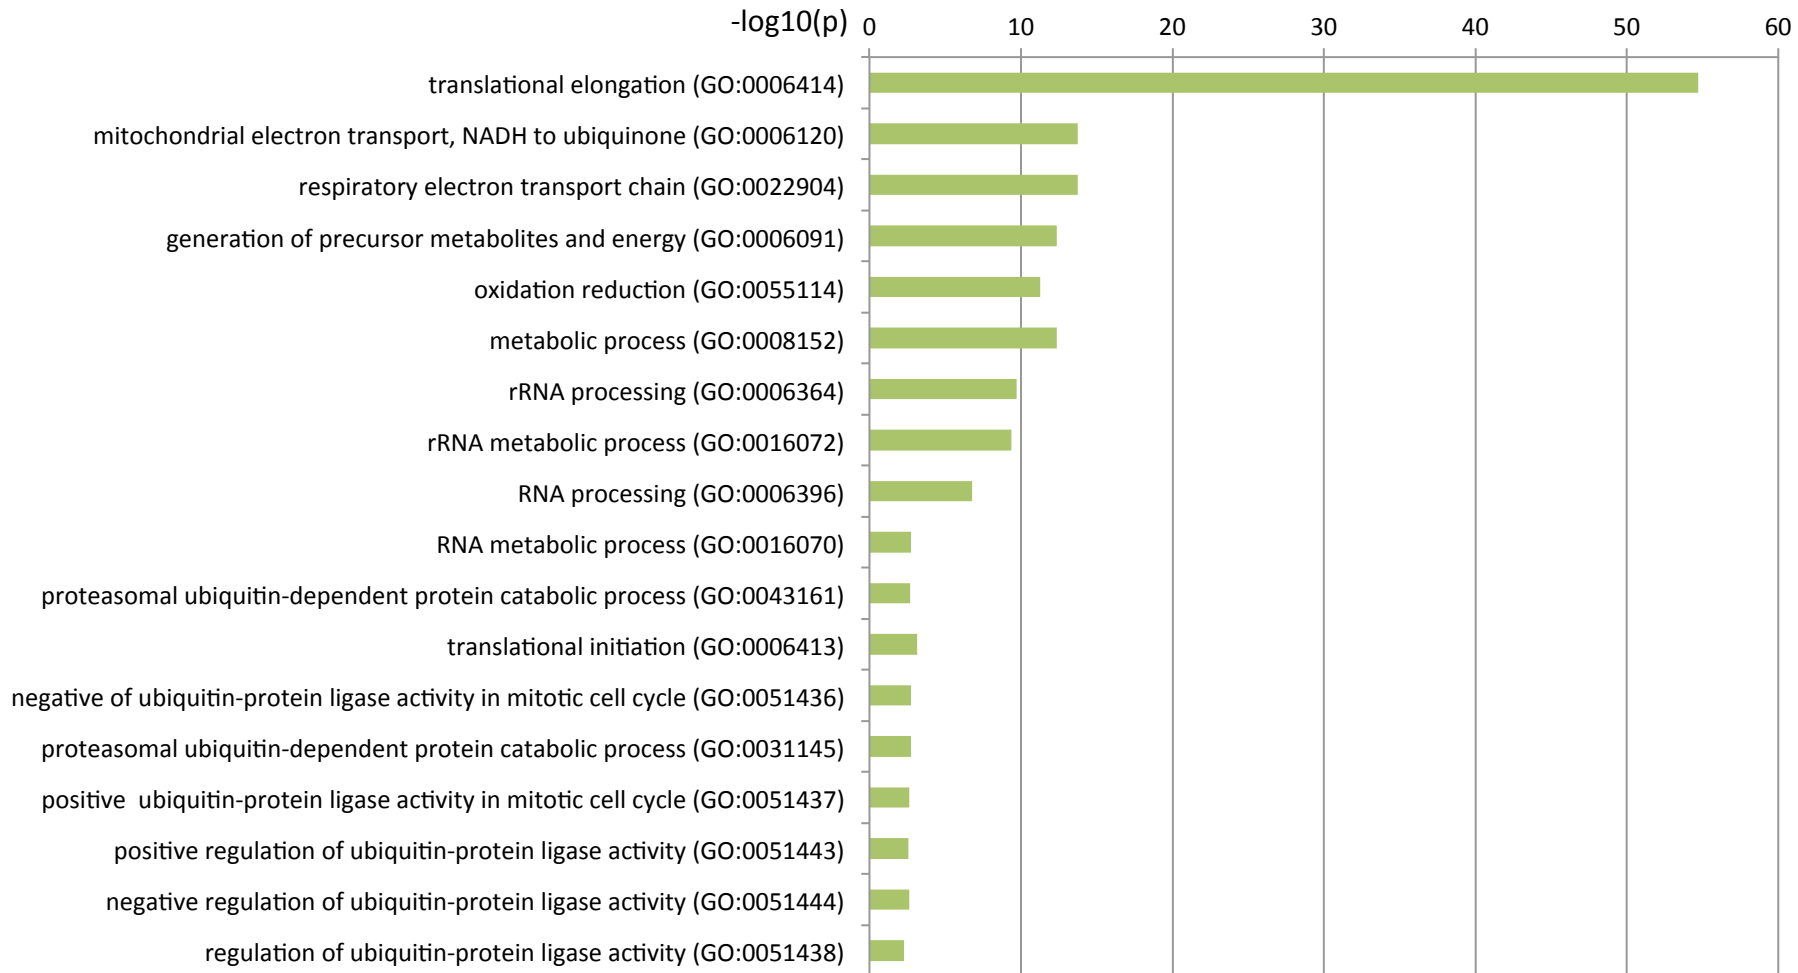

**Supplementary figure11 (Figure S11): Oxidative stress was induced mostly in glomerular endothelial cells instead of podocytes in eNOS<sup>-/-</sup> diabetic mice**

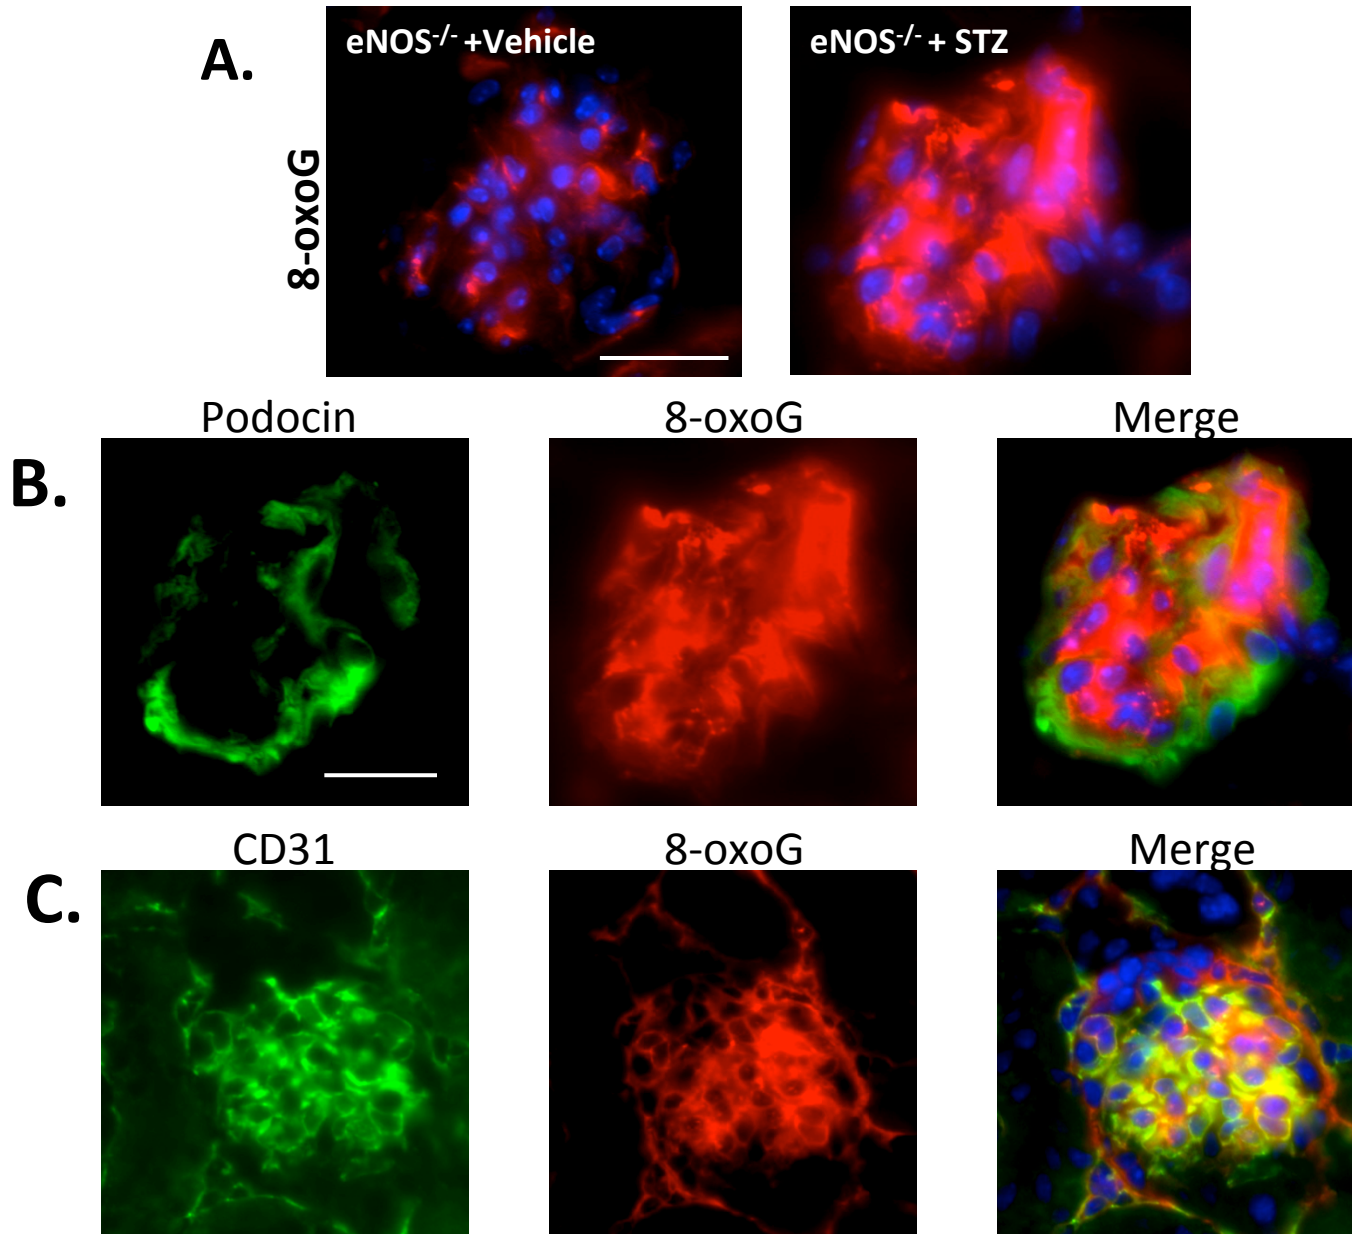

## Supplementary table 1 (Table 1S): List of top 50 genes which were differentially expressed between diabetic and control mice with Fc>2

- **Glo\_Con\_Glo\_Con\_2fold\_downregulated**

- Gdf5, Steap4, Angptl7, Sox8, Kcng2, Gja3, Gzma, Snx31, Fgfbp1, Pcdh19, Ptchd4, Cacna2d2, Sstr5, 1810041L15Rik, Lrrc17, Aifm3, Samd5, Thsd7a, Vtcn1, Defb47, Astn2, Robo2, Ephb1, Grm7, Eya1, Sulf1, Gm266, Magi2, 6430531B16Rik, Steap3, Cyp26a1, Hs3st3b1, Dpysl5, C1qtnf7, Neb1, Cers6, Fgfr4, Lrrc49, Lmx1b, Gbx1, Amph, Zbtb7c, Arhgap32, Dbx1, C030030A07Rik, 6530402F18Rik, Zbtb8a, Angptl2, Dpp4, Dlgap1

- **Glo\_Con\_Glo\_Con\_2fold\_upregulated**

- Col10a1, Clec4n, Rgs1, Lcn2, Fpr1, H2-M2, P2ry13, C1qb, C1qc, Ccl2, Lpcat2b, C1qa, Mpeg1, Sostdc1, Spp1, Pigr, Fpr2, Tlr8, C3ar1, Cldn3, Fosb, Pdk4, Fam46b, Gpr65, Clec12a, S100g, Wfdc2, Mreg, Lgals3, Plcd4, Cd68, Acp5, Slc40a1, Sox9, Bcl2a1b, Mmp12, Fcgr1, Ptafr, Ctss, Kcns1, Abcg3, Atp6v0d2, Spic, Emr1, 1700091H14Rik, Calb1, Tlr1, Calml3, Nr0b2, Arhgef38

- **Podo\_STZ\_Podo\_Con\_2fold\_downregulated**

- S100g, Wfdc15b, Defb1, Gpx6, Pvalb, Fxyd2, Cldn8, Ppp1r1a, BB031773, Gm20826, Klk1, Pgam2, Kl, Ptafr, Mal, Klhl38, Tmem52b, Degs2, Paqr5, Calb1, Emx1, Efhd1, Umod, Ly6a, Sprr1a, Slc16a7, Gdf1, Cers1, Slc12a3, Sostdc1, S100a14, Clcnkb, Oog4, Gm4070, Ttc36, Glod5, Wfdc2, Sfrp1, Pdzk1ip1, 1700074H08Rik, Pkib, Tmem190, Kng2, Tmem213, 1700011H14Rik, Kcnj1, Cd2, Tmem229a, Fetub, Cldn10, Fabp3

- **Podo\_STZ\_Podo\_Con\_2fold\_upregulated**

- Tlr5, Gabrb1, Nedd9, Nlrp9a, Mgat5, Rassf8, Cdkl5, D10Bwg1379e, Mybpc2, Nt5dc3, Zdhhc11, Tmtc1, Ksr2, Olfr1444, Capsl, Agtpbp1, Fv1, Prx, Nat8l, Lrba, Lrba, Slc26a7, Rpgr, Btdb9, Nrf1, Vwa8, Tcaim, Pstpip2, Col4a6, Lims1, Zfp101, Creb3l2, Topaz1, Stk4, Mrs2, Ncam1, Pogk, Pogk, Pdlim5, Zfp72, Pcdhga10, Ipo7, 2700050L05Rik, Kpna1, Kif18a, Zfp759, Trim44, Pprc1, Amot, Gpld1

**Supplementary table 2 (Table S2): Primers for RT-PCR**

| Gene    | Forward                       | Reverse                       |
|---------|-------------------------------|-------------------------------|
| Gapdh   | 5'-GCCATCAACGACCCCTTCAT-3'    | 5'-ATGATGACCCGTTTGGCTCC-3'    |
| Nphs1   | 5'-GTGCCCTGAAGGACCCTACT-3'    | 5'-CCTGTGGATCCCTTTGACAT-3'    |
| Nphs2   | 5'-CTTGGCACATCGATCCCTCA-3'    | 5'-CGCACTTTGGCCTGTCTTTG-3'    |
| Synpo   | 5'-CTTTGGGGAAGAGGCCGATTG -3'  | 5'-GTTTTCGGTGAAGCTTGTGC-3'    |
| Wt1     | 5'-GAGAGCCAGCCTACCATCC-3'     | 5'-GGGCCTCGTGTGTTGAAGGAA-3'   |
| Pecam-1 | 5'-AGCCTAGTGTGGAAGCCAAC-3'    | 5'-AGCCTCCGTTCTCTTGGTG-3'     |
| Cdh5    | 5'-GTGCATGCTAACACAGGGAATG-3'  | 5'-AATACCTGGTGCGAAAACACA-3'   |
| Vav1    | 5'-TGTGAGAAGTTCGGCCTCAAG-3'   | 5'-CAGAGCAGACAGGGTGTAGAT-3'   |
| Was     | 5'-CCAGCCGTTCAAGCAGAACAT-3'   | 5'-GGTTATCCTTACGAAGCACA-3'    |
| Itgax   | 5'-CTGGATAGCCTTCTTCTGCTG-3'   | 5'-GCACACTGTGTCCGAACTCA-3'    |
| Rac2    | 5'-GACAGTAAGCCGGTGAACCTG-3'   | 5'-CTGACTAGCGAGAAGCAGATG-3'   |
| Pdgfa   | 5'-AGGTATGTATCCACACATGCGT-3'  | 5'-AGTTCCTGTTGGTTTCATCTCG-3'  |
| Iqgap2  | 5'-TACGGCTCAATCGTGGATGAT-3'   | 5'-GGTGGCAATTCTTCAACTAAGCA-3' |
| Rock2   | 5'-TTGGTTCGTCATAAGGCATCAC-3'  | 5'-TGTTGGCAAAGGCCATAATATCT-3' |
| Ndufb5  | 5'-CAAGAGACTGTTTGTGTCGAAGC-3' | 5'-TGTTCAACAGTGTTATGCCAAT-3'  |
| Ndufb6  | 5'-GTCTTTAAGGCGTACCGCTC-3'    | 5'-CTGGGCTTCGAGCTAACAATG-3'   |
| Ndufs6  | 5'-TTCGGGGTTCAAGTGTGCGC-3'    | 5'-CACAGGCTGTTGTGCTATCAA-3'   |
| Ndufs4  | 5'-TCCTTTGATGGGTTGGGCAT-3'    | 5'-GACTTGGACTTGGGTTTCGG-3'    |
| Pax2    | 5'-AAGCCCGGAGTGATTGGTG-3'     | 5'-CAGGCGAACATAGTCGGGTT-3'    |
| Cyb5rl  | 5'-TAATCAAGTGCTACCGGACTGG-3'  | 5'-CGCCGTA CTCTTTGGTTCAT-3'   |
| Nnt     | 5'-GGGTCAGTTGTTGTGGATTTAGC-3' | 5'-GCCTTCAGGAGCTTAGTGATGTT-3' |

| Gene   | Forward                       | Reverse                       |
|--------|-------------------------------|-------------------------------|
| Bax    | 5'-TGAAGACAGGGGCCTTTTTG-3'    | 5'-AATTCGCCGGAGACACTCG-3'     |
| Cdc40  | 5'-TGTCATCTGTGAAAAGGTGGTC-3'  | 5'-ACTGGAGCAGCGGTGTTATG-3'    |
| Bid    | 5'-GCCGAGCACATCACAGACC-3'     | 5'-TGGCAATGTTGTGGATGATTTCT-3' |
| Dapk1  | 5'-ATGACTGTGTTTCAGGCAGGAA-3'  | 5'-CCGGTACTTTTCTCACGACATTT-3' |
| Acta1  | 5'-TACCACCGGCATCGTGTTG-3'     | 5'-GCGCACAAATCTCACGTTTCAG-3'  |
| Col1a1 | 5'-GCTCCTCTTAGGGGCCACT-3'     | 5'-CCACGTCTCACCATTGGGG-3'     |
| Fn1    | 5'-GATGTCCGAACAGCTATTTACCA-3' | 5'-CCTTGCGACTTCAGCCACT-3'     |
| Cdh1   | 5'-CAGGTCTCCTCATGGCTTTGC-3'   | 5'-CTCCGAAAAGAAGGCTGTCC-3'    |
